# Supplementary material
Source: publisher site journal article supplement (https://static.cambridge.org/content/id/urn:cambridge.org:id:article:S0033291714000373/resource/name/PSM00905KantrowitzSupplementaryMaterial.doc)
Supplement: Supplementary file 1 [file PSM00905KantrowitzSupplementaryMaterial.doc]

**Supplementary Material**

**General comments for the experimenter**

1 – The suggested order of task presentation must be respected.

2 – The test duration is 1 hour.

3 – The subject should take breaks as required.

4 – Examples are provided preceding each task to ensure the subject has clearly understood the task instructions. These examples may be repeated as necessary. Feedback should be provided on these examples (no feedback on experimental trials). IN the even where the subject is unable to decide on a response, they should be encouraged to answer as best as possible. All trials should be answered.

5 – To note is that all tests contain strategic trials which must be answered correctly for responses to be considered. Therefore, it is essential to remain attentive throughout the duration of the entire testing session.

**1 – Melodic Organization Conditions**

**a) Scale discrimination – Task 1**

*You will hear a warning signal followed by two melodies. After you hear each pair, decide if the melodies were the same or different. If you think they were the same, just say ‘same’*, *and if you think they were different, just say ‘different’. We will now begin with two examples.* After the examples say *there will be 31 pairs of melodies.*

**b) Different contour – Task 2**

Same instructions as above, but it must be noted that the difference here will be very subtle*.*

**c) Same contour – Task 3**

Same instructions as in condition **1b).**

**2 – Temporal Organization**

**a) Rhythmic contour – Task 4**

*You will hear a warning signal followed by two melodies. After you hear each pair, decide if the melodies were the same or different. If you think they were the same, just say ‘same’*, *and if you think they were different, just say ‘different’. We will now begin with two examples.* After the examples say *there will be 31 pairs of melodies.*

**b) Metric task – Task 5**

*You will hear melodies, presented one at a time. The melodies will either be a waltz or a march. After each melody, you are to decide whether it is a waltz or a march.*

*A march rhythm is in two with a strong beat followed by a weak beat* (play example one, try to tap along: tap 1 2, 1 2), *whereas a waltz rhythm is in three, where a strong beat is followed by two weak beats* (play example two, try to tap along: tap 1 2 3, tap 1 2 3). *To make it easier to decide if it’s a waltz or a march, it may help to imagine if one could dance a waltz or march to the melody. You will now hear a third example, try to decide if it is a waltz or a march* (play example 3, repeat with tapping if necessary). *That was a waltz. Here is a fourth example* (play example 4, repeat with tapping if necessary). *That was a march.* You can repeat the 4 examples to practice, if necessary. *We will now begin the test; there will be 30 melodies.*

**3- Incidental memory test – Task 6**

*Over this testing session, you have heard various melodies several times. In this final task, you will listen to 30 tunes. Some of these have already been presented to you in the previous test, while others will be completely new. Following each melody, decide if you have heard it before in the previous tests or not – just say yes if you have and no if you haven’t. You will now hear two examples.*
